# Supplementary material
Source: PubMed Central journal article supplement (PMC3183994)
Supplement: NIHMS35429-supplement-01.pdf [file NIHMS35429-supplement-01.pdf]

## **Supplementary tables**

Supplementary Table 1. Crude and age-standardized (95% CI) prevalence of cardiovascular disease risk factors by migration status.

| Risk factor           | Crude Prevalences |                  |                | Age-standardized Prevalences (95% CI)* |                      |                      |
|-----------------------|-------------------|------------------|----------------|----------------------------------------|----------------------|----------------------|
|                       | Rural<br>n (%)    | Migrant<br>n (%) | Urban<br>n (%) | Rural<br>(%)                           | Migrant<br>(%)       | Urban<br>(%)         |
|                       | n = 201           | n = 589          | n = 199        | n = 201                                | n = 589              | n = 199              |
| Current smoker        | 11 (5.5 %)        | 59 (10 %)        | 40 (20.1 %)    | 4.8% (2.6%; 6.9%)                      | 9.2% (7%; 11.5%)     | 19.6% (14.8%; 24.4%) |
| Low physical activity | 4 (2%)            | 173 (29.7%)      | 78 (39.4%)     | 2.2% (0.6%; 3.7%)                      | 32.2% (28.6%; 35.9%) | 38.5% (32.4%; 44.7%) |
| Obesity               | 6 (3%)            | 124 (21.1%)      | 68 (34.2%)     | 2.9% (0.7%; 5.1%)                      | 19.5% (16.5%; 22.5%) | 32.7% (26.9%; 38.5%) |
| Overweight and obese  | 39 (19.4%)        | 395 (67.3%)      | 141 (70.9%)    | 18.2% (13.6%; 22.8%)                   | 66.9% (63.2%; 70.6%) | 68.3% (62.6%; 74%)   |
| Hypertension          | 24 (11.9%)        | 77 (13.1%)       | 59 (29.7%)     | 10.7% (7.5%; 13.9%)                    | 15.5% (13.2%; 17.7%) | 28.9% (23.9%; 33.8%) |
| Diabetes              | 1 (0.5%)          | 13 (2.2%)        | 10 (5%)        | 0.8% (0%; 1.6%)                        | 2.8% (1.6%; 4%)      | 6.3% (3.5%; 9.1%)    |
| IFG and diabetes      | 3 (1.5%)          | 23 (3.9%)        | 16 (8%)        | 2.9% (1.4%; 4.3%)                      | 6.9% (5.1%; 8.7%)    | 19.5% (15.5%; 23.6%) |
| Hypercholesterolemia  | 15 (7.5%)         | 220 (37.4%)      | 71 (35.7%)     | 8.7% (5.4%; 11.9%)                     | 34.6% (31%; 38.2%)   | 35.1% (28.7%; 41.5%) |
| Metabolic Syndrome    | 23 (11.4%)        | 193 (32.8%)      | 89 (44.7%)     | 12.1% (8.0%; 16.2%)                    | 31.8% (28.3%; 35.2%) | 43.1% (37.2%; 48.9%) |

\* Age-standardized to WHO world population 2000-2025.

Supplementary Table 2. Within groups SD and SMD (95% CI) in cardiovascular disease risk factors in migrant and urban population compared to rural population.

|                         | Model 1                       |                         |                       | Model 2                 |                       | Model 3                 |                       |
|-------------------------|-------------------------------|-------------------------|-----------------------|-------------------------|-----------------------|-------------------------|-----------------------|
|                         | Rural*<br>Within groups<br>SD | Migrant<br>SMD (95% CI) | Urban<br>SMD (95% CI) | Migrant<br>SMD (95% CI) | Urban<br>SMD (95% CI) | Migrant<br>SMD (95% CI) | Urban<br>SMD (95% CI) |
| BMI                     | 4.2                           | 0.8 (0.6; 1)            | 1 (0.8; 1.3)          | --                      | --                    | 0.8 (0.6; 1)            | 1 (0.8; 1.3)          |
| WHR                     | 0.06                          | 1 (0.8; 1.2)            | 0.7 (0.5; 1)          | 0.5 (0.4; 0.7)          | 0.2 (-0.1; 0.4)       | 0.6 (0.4; 0.8)          | 0.2 (0; 0.4)          |
| Waist<br>circumference  | 10                            | 1 (0.8; 1.2)            | 1.3 (1; 1.5)          | 0.3 (0.2; 0.4)          | 0.4 (0.3; 0.5)        | 0.3 (0.2; 0.4)          | 0.4 (0.2; 0.5)        |
| All skinfolds           | 25.3                          | 1.4 (1.2; 1.6)          | 1.8 (1.6; 2.1)        | 0.8 (0.7; 1)            | 1.1 (0.9; 1.3)        | 0.8 (0.6; 0.9)          | 1 (0.8; 1.2)          |
| SBP                     | 16.1                          | 0 (-0.2; 0.2)           | 0.5 (0.3; 0.8)        | -0.1 (-0.4; 0.1)        | 0.3 (0.1; 0.6)        | -0.1 (-0.4; 0.1)        | 0.3 (0; 0.6)          |
| DBP                     | 9.4                           | -0.4 (-0.6; -0.2)       | 0.1 (-0.1; 0.4)       | -0.6 (-0.8; -0.4)       | -0.2 (-0.5; 0)        | -0.6 (-0.8; -0.4)       | -0.2 (-0.5; 0)        |
| Total cholesterol       | 37.9                          | 0.9 (0.7; 1.1)          | 1 (0.7; 1.2)          | 0.8 (0.6; 1)            | 0.8 (0.5; 1)          | 0.7 (0.5; 0.9)          | 0.7 (0.4; 1)          |
| HDL                     | 11.6                          | 0 (-0.3; 0.2)           | 0 (-0.3; 0.3)         | 0.2 (0; 0.4)            | 0.3 (0; 0.5)          | 0.2 (0; 0.4)            | 0.3 (0; 0.5)          |
| LDL                     | 32                            | 1 (0.8; 1.2)            | 1 (0.8; 1.3)          | 0.8 (0.6; 1.1)          | 0.9 (0.6; 1.1)        | 0.8 (0.5; 1)            | 0.8 (0.5; 1)          |
| Triglycerides (log)     | 0.5                           | 0.2 (0; 0.4)            | 0.2 (-0.1; 0.4)       | 0 (-0.2; 0.2)           | -0.2 (-0.4; 0.1)      | -0.1 (-0.3; 0.2)        | -0.2 (-0.5; 0.1)      |
| TC/HDL ratio            | 1.4                           | 0.6 (0.4; 0.8)          | 0.7 (0.4; 0.9)        | 0.4 (0.2; 0.6)          | 0.3 (0.1; 0.6)        | 0.3 (0.1; 0.5)          | 0.2 (0; 0.5)          |
| CRP (log)               | 1.4                           | 0.8 (0.6; 1)            | 0.8 (0.6; 1.1)        | 0.6 (0.4; 0.8)          | 0.6 (0.3; 0.8)        | 0.6 (0.4; 0.8)          | 0.6 (0.3; 0.9)        |
| Fibrinogen (log)        | 0.2                           | 0.5 (0.3; 0.7)          | 0.5 (0.2; 0.7)        | 0.4 (0.2; 0.7)          | 0.4 (0.2; 0.7)        | 0.5 (0.3; 0.7)          | 0.5 (0.2; 0.8)        |
| Glucose (log)           | 0.2                           | 0.5 (0.3; 0.7)          | 0.9 (0.6; 1.1)        | 0.3 (0.1; 0.5)          | 0.6 (0.3; 0.8)        | 0.3 (0.1; 0.5)          | 0.6 (0.3; 0.9)        |
| HbA <sub>1c</sub> (log) | 0.1                           | 0 (-0.2; 0.2)           | 0.4 (0.1; 0.6)        | -0.1 (-0.3; 0.1)        | 0.2 (0; 0.5)          | -0.1 (-0.3; 0.1)        | 0.3 (0; 0.5)          |
| Insulin (log)           | 1.1                           | 1 (0.8; 1.2)            | 1.2 (0.9; 1.5)        | 0.7 (0.5; 0.9)          | 0.8 (0.6; 1.1)        | 0.7 (0.4; 0.9)          | 0.7 (0.4; 1)          |
| HOMA-IR (log)           | 0.8                           | 1.4 (1.2; 1.7)          | 1.6 (1.3; 1.9)        | 1 (0.8; 1.2)            | 1.1 (0.9; 1.3)        | 1 (0.8; 1.2)            | 1 (0.8; 1.3)          |

Notes: Model 1: adjusted for age, sex, individual's socioeconomic deprivation and parental education; Model 2: as Model 1 plus BMI; Model 3: as Model 2 plus physical activity in 3 MET score categories (except only for BMI estimates where BMI was not included). \* Rural SD values were derived from Model 1 adjusting for age, sex, individual socioeconomic deprivation and highest parental education.

Supplementary Table 3. Association (OR and 95% CI) between cardiovascular risk factors and migration status.

| Risk factor           | Rural (Reference) | Model 1             |                      | Model 2             |                      | Model 3             |                      |
|-----------------------|-------------------|---------------------|----------------------|---------------------|----------------------|---------------------|----------------------|
|                       |                   | Migrant OR (95% CI) | Urban OR (95% CI)    | Migrant OR (95% CI) | Urban OR (95% CI)    | Migrant OR (95% CI) | Urban OR (95% CI)    |
| Current smoker        | 1                 | 1.09 (0.45; 2.65)   | 2.54 (0.96; 6.72)    | 1.02 (0.41; 2.51)   | 2.32 (0.86; 6.22)    | 0.82 (0.32; 2.12)   | 1.83 (0.65; 5.17)    |
| Low physical activity | 1                 | 22.5 (7.85; 64.48)  | 33.11 (10.99; 99.73) | 22.18 (7.69; 63.99) | 32.78 (10.76; 99.83) | –                   | –                    |
| Obesity               | 1                 | 9.41 (3.8; 23.25)   | 20.07 (7.57; 53.22)  | –                   | –                    | 9.15 (3.58; 23.41)  | 19.01 (6.94; 52.09)  |
| Overweight and obese  | 1                 | 5.89 (3.67; 9.45)   | 5.74 (3.21; 10.24)   | –                   | –                    | 6.06 (3.62; 10.14)  | 5.7 (3.07; 10.59)    |
| Hypertension          | 1                 | 1.53 (0.81; 2.89)   | 4.96 (2.32; 10.6)    | 1.09 (0.56; 2.11)   | 3.29 (1.5; 7.19)     | 1.12 (0.55; 2.27)   | 3.32 (1.44; 7.64)    |
| Diabetes              | 1                 | 6 (0.7; 51.86)      | 15.93 (1.6; 159.19)  | 4.3 (0.49; 38.16)   | 10.03 (0.95; 106.42) | 5.58 (0.6; 52.29)   | 13.14 (1.17; 148.09) |
| IFG or diabetes       | 1                 | 3.52 (0.92; 13.42)  | 8.86 (2.01; 39.08)   | 2.16 (0.55; 8.52)   | 4.61 (0.98; 21.7)    | 2 (0.47; 8.49)      | 4.23 (0.83; 21.6)    |
| Hypercholesterolemia  | 1                 | 7.46 (3.99; 13.94)  | 5.67 (2.79; 11.5)    | 5.74 (3.04; 10.86)  | 3.88 (1.88; 8.03)    | 5.28 (2.7; 10.31)   | 3.52 (1.65; 7.53)    |
| Metabolic syndrome    | 1                 | 4.92 (2.82; 8.58)   | 7.81 (4.1; 14.89)    | 2.06 (1.11; 3.83)   | 2.8 (1.37; 5.74)     | 2.12 (1.09; 4.1)    | 2.93 (1.37; 6.26)    |

Notes: Model 1: adjusted for age, sex, individual's socioeconomic deprivation and parental education; Model 2: as Model 1 plus BMI; Model 3: as Model 2 plus physical activity in 3 MET score categories, with the exception of obesity / overweight where BMI was not considered.

Supplementary Table 4.  $\beta$  coefficients (95% CI), geometric mean ratios (95% CI), and odds ratios (95% CI) of cardiovascular risk factors in migrants by age at first migration.

| Migration Status                                     | Model 1             |                              | Model 2                      | Model 3                      |
|------------------------------------------------------|---------------------|------------------------------|------------------------------|------------------------------|
|                                                      | $\leq 12$ years old | $> 12$ years old             | $> 12$ years old             | $> 12$ years old             |
| <b>Continuous normally distributed variables</b>     | Reference           | $\beta$ coefficient (95% CI) | $\beta$ coefficient (95% CI) | $\beta$ coefficient (95% CI) |
| BMI                                                  | --                  | 0.7 (0; 1.4)                 | --                           | 0.6 (-0.1; 1.3)              |
| Waist-to-hip ratio                                   | --                  | 0.01 (0; 0.02)               | 0.01 (0; 0.01)               | 0.01 (0; 0.01)               |
| All skinfolds                                        | --                  | 3.2 (-1.2; 7.6)              | 0.3 (-2.8; 3.4)              | 0.5 (-2.6; 3.6)              |
| Systolic blood pressure*                             | --                  | -0.7 (-3.2; 1.7)             | -1.3 (-3.7; 1.1)             | -1.2 (-3.6; 1.2)             |
| Diastolic blood pressure*                            | --                  | -0.4 (-1.9; 1.2)             | -0.9 (-2.4; 0.5)             | -0.7 (-2.2; 0.7)             |
| Total cholesterol                                    | --                  | 6 (-0.7; 12.7)               | 4.8 (-1.8; 11.4)             | 5.7 (-0.9; 12.3)             |
| HDL                                                  | --                  | 0.5 (-1.4; 2.4)              | 1 (-0.9; 2.8)                | 1.1 (-0.8; 3)                |
| LDL                                                  | --                  | 4.1 (-1.5; 9.7)              | 3.2 (-2.3; 8.8)              | 3.8 (-1.8; 9.4)              |
| TC/HDL ratio                                         | --                  | 0.1 (-0.1; 0.4)              | 0 (-0.2; 0.3)                | 0.1 (-0.2; 0.3)              |
| <b>Continuous non-normally distributed variables</b> | Reference           | Ratio (95% CI)               | Ratio (95% CI)               | Ratio (95% CI)               |
| Triglycerides (mg/dL)                                | --                  | 1.04 (0.95; 1.14)            | 1.01 (0.93; 1.1)             | 1.02 (0.93; 1.11)            |
| Glucose (mg/dL)                                      | --                  | 1.04 (1.01; 1.07)            | 1.03 (1.01; 1.06)            | 1.03 (1; 1.06)               |
| HbA <sub>1c</sub> (%)                                | --                  | 1.02 (1; 1.05)               | 1.02 (1; 1.04)               | 1.02 (1; 1.04)               |
| Insulin ( $\mu$ IU/mL)                               | --                  | 0.95 (0.78; 1.16)            | 0.89 (0.74; 1.07)            | 0.9 (0.75; 1.09)             |
| HOMA-IR                                              | --                  | 0.99 (0.88; 1.12)            | 0.94 (0.85; 1.03)            | 0.94 (0.86; 1.04)            |
| CRP (mg/L)                                           | --                  | 1.05 (0.84; 1.31)            | 1 (0.8; 1.24)                | 1 (0.8; 1.24)                |
| Fibrinogen (mg/dL)                                   | --                  | 0.98 (0.94; 1.02)            | 0.98 (0.94; 1.02)            | 0.98 (0.94; 1.02)            |
| <b>Categorical variables</b>                         | Reference           | OR (95% CI)                  | OR (95% CI)                  | OR (95% CI)                  |
| Current smoker                                       | 1                   | 0.7 (0.39; 1.25)             | 0.72 (0.4; 1.28)             | 0.74 (0.41; 1.34)            |
| Low physical activity                                | 1                   | 0.97 (0.67; 1.42)            | 0.97 (0.66; 1.41)            | --                           |
| Obesity                                              | 1                   | 1.37 (0.87; 2.14)            | --                           | 1.34 (0.85; 2.1)             |
| Overweight and obese                                 | 1                   | 1.4 (0.97; 2.02)             | --                           | 1.37 (0.95; 1.98)            |
| Hypertension                                         | 1                   | 0.73 (0.42; 1.27)            | 0.69 (0.4; 1.21)             | 0.7 (0.4; 1.22)              |
| Diabetes                                             | 1                   | 7.45 (0.95; 58.72)           | 7.21 (0.92; 56.84)           | 7.05 (0.9; 55.48)            |
| IFG or diabetes                                      | 1                   | 6.36 (1.46; 27.77)           | 6.3 (1.43; 27.82)            | 6.07 (1.36; 27.06)           |
| Hypercholesterolemia                                 | 1                   | 1.18 (0.82; 1.69)            | 1.12 (0.78; 1.62)            | 1.16 (0.8; 1.68)             |
| Metabolic syndrome                                   | 1                   | 1.71 (1.16; 2.53)            | 1.65 (1.07; 2.55)            | 1.66 (1.08; 2.57)            |

Notes: Model 1: adjusted for age, sex, individual's socioeconomic deprivation and parental education; Model 2: as Model 1 plus BMI; Model 3: as Model 2 plus physical activity in 3 MET score categories, with the exception of BMI and obesity / overweight where BMI was not considered.

\* SBP and DBP estimates derived from censored regression analyses.

Supplementary Table 5.  $\beta$  coefficients (95% CI), geometric mean ratios (95% CI), and odds ratios (95% CI) of cardiovascular risk factors in migrants by length of residency (in years) in urban area.

| Migration Status                                     | Model 1                 |                              |                              |                               | Model 2                      |                              |                               | Model 3                      |                              |                               |
|------------------------------------------------------|-------------------------|------------------------------|------------------------------|-------------------------------|------------------------------|------------------------------|-------------------------------|------------------------------|------------------------------|-------------------------------|
|                                                      | <20 years in urban area | 20-29 years in urban area    | 30-39 years in urban area    | $\geq$ 40 years in urban area | 20-29 years in urban area    | 30-39 years in urban area    | $\geq$ 40 years in urban area | 20-29 years in urban area    | 30-39 years in urban area    | $\geq$ 40 years in urban area |
| <b>Continuous normally distributed variables</b>     | Reference               | $\beta$ coefficient (95% CI) | $\beta$ coefficient (95% CI) | $\beta$ coefficient (95% CI)  | $\beta$ coefficient (95% CI) | $\beta$ coefficient (95% CI) | $\beta$ coefficient (95% CI)  | $\beta$ coefficient (95% CI) | $\beta$ coefficient (95% CI) | $\beta$ coefficient (95% CI)  |
| BMI                                                  | --                      | 1.2 (-0.1; 2.5)              | 2 (0.7; 3.4)                 | 1.2 (-0.3; 2.7)               | --                           | --                           | --                            | 1.3 (0.1; 2.6)               | 2.2 (0.8; 3.5)               | 1.4 (-0.2; 2.9)               |
| Waist-to-hip ratio                                   | --                      | 0.01 (0; 0.03)               | 0.03 (0.01; 0.05)            | 0.03 (0.01; 0.05)             | 0.01 (-0.01; 0.02)           | 0.02 (0; 0.03)               | 0.02 (0; 0.04)                | 0.01 (-0.01; 0.02)           | 0.02 (0; 0.03)               | 0.02 (0; 0.04)                |
| All skinfolds                                        | --                      | 6.3 (-1.5; 14.1)             | 11.8 (3.4; 20.1)             | 9.3 (-0.1; 18.7)              | 0.8 (-4.7; 6.3)              | 2.4 (-3.5; 8.3)              | 3.8 (-2.9; 10.4)              | 1 (-4.6; 6.5)                | 2.6 (-3.4; 8.5)              | 4.1 (-2.6; 10.8)              |
| Systolic blood pressure*                             | --                      | -0.8 (-5.1; 3.5)             | -0.4 (-4.9; 4.2)             | -1.9 (-7.1; 3.3)              | -1.8 (-5.9; 2.4)             | -2 (-6.4; 2.5)               | -2.8 (-7.9; 2.3)              | -1.8 (-6; 2.4)               | -2 (-6.5; 2.5)               | -2.9 (-8; 2.2)                |
| Diastolic blood pressure*                            | --                      | 1.3 (-1.5; 4.1)              | 2.8 (-0.2; 5.7)              | 1.8 (-1.6; 5.2)               | 0.4 (-2.2; 2.9)              | 1.2 (-1.6; 4)                | 0.9 (-2.3; 4)                 | 0.4 (-2.2; 3)                | 1 (-1.7; 3.8)                | 0.7 (-2.4; 3.9)               |
| Total cholesterol                                    | --                      | 13.5 (1.7; 25.4)             | 16.9 (4.3; 29.5)             | 16.4 (2.1; 30.8)              | 11.1 (-0.5; 22.7)            | 12.7 (0.2; 25.2)             | 14.1 (0.1; 28.2)              | 10.9 (-0.8; 22.5)            | 11.8 (-0.7; 24.4)            | 12.9 (-1.2; 27.1)             |
| HDL                                                  | --                      | 1.7 (-1.7; 5.1)              | -1.7 (-5.3; 1.9)             | -0.3 (-4.4; 3.8)              | 2.6 (-0.8; 5.9)              | -0.3 (-3.8; 3.3)             | 0.4 (-3.5; 4.4)               | 2.3 (-1; 5.6)                | -0.4 (-4; 3.1)               | 0.2 (-3.8; 4.1)               |
| LDL                                                  | --                      | 10 (0.1; 19.8)               | 11.7 (1.2; 22.3)             | 13.3 (1.4; 25.3)              | 8.1 (-1.6; 17.9)             | 8.6 (-1.9; 19.1)             | 11.6 (-0.1; 23.4)             | 8.3 (-1.5; 18.1)             | 8 (-2.5; 18.5)               | 10.8 (-1.1; 22.7)             |
| TC/HDL ratio                                         | --                      | 0.3 (-0.2; 0.7)              | 0.6 (0.2; 1.1)               | 0.5 (0; 1)                    | 0.1 (-0.3; 0.5)              | 0.4 (0; 0.8)                 | 0.4 (-0.1; 0.9)               | 0.1 (-0.3; 0.5)              | 0.4 (0; 0.8)                 | 0.4 (-0.1; 0.9)               |
| <b>Continuous non-normally distributed variables</b> | Reference               | Ratio (95% CI)               | Ratio (95% CI)               | Ratio (95% CI)                | Ratio (95% CI)               | Ratio (95% CI)               | Ratio (95% CI)                | Ratio (95% CI)               | Ratio (95% CI)               | Ratio (95% CI)                |
| Triglycerides (mg/dL)                                | --                      | 1.02 (0.87; 1.2)             | 1.23 (1.03; 1.46)            | 1.12 (0.92; 1.36)             | 0.97 (0.83; 1.13)            | 1.13 (0.95; 1.33)            | 1.06 (0.88; 1.28)             | 0.96 (0.82; 1.12)            | 1.12 (0.95; 1.32)            | 1.06 (0.88; 1.28)             |
| Glucose (mg/dL)                                      | --                      | 1.03 (0.98; 1.08)            | 1.06 (1; 1.12)               | 1.05 (0.99; 1.12)             | 1.02 (0.97; 1.07)            | 1.04 (0.98; 1.1)             | 1.04 (0.98; 1.11)             | 1.01 (0.96; 1.07)            | 1.04 (0.98; 1.1)             | 1.04 (0.98; 1.11)             |
| HbA <sub>1c</sub> (%)                                | --                      | 1 (0.96; 1.03)               | 1.03 (0.99; 1.08)            | 1.02 (0.97; 1.06)             | 0.99 (0.96; 1.03)            | 1.03 (0.99; 1.07)            | 1.01 (0.97; 1.06)             | 0.99 (0.95; 1.03)            | 1.03 (0.99; 1.07)            | 1.01 (0.97; 1.06)             |
| Insulin ( $\mu$ U/mL)                                | --                      | 1.05 (0.73; 1.44)            | 1.23 (0.85; 1.81)            | 1.01 (0.66; 1.36)             | 0.93 (0.66; 1.2)             | 1 (0.7; 1.44)                | 0.9 (0.6; 1.34)               | 0.92 (0.66; 1.18)            | 1.01 (0.71; 1.31)            | 0.92 (0.61; 1.23)             |

|                              |                  |                        |                        |                        |                        |                        |                        |                        |                        |                        |
|------------------------------|------------------|------------------------|------------------------|------------------------|------------------------|------------------------|------------------------|------------------------|------------------------|------------------------|
|                              |                  | 1.49)                  | 1.8)                   | 1.55)                  | 1.29)                  |                        |                        | 1.29)                  | 1.45)                  | 1.38)                  |
| HOMA-IR                      | --               | 1.08 (0.87;<br>1.32)   | 1.27 (1.02;<br>1.58)   | 1.28 (0.99;<br>1.65)   | 0.95 (0.8;<br>1.13)    | 1.04 (0.86;<br>1.25)   | 1.12 (0.91;<br>1.38)   | 0.95 (0.8;<br>1.13)    | 1.05 (0.87;<br>1.27)   | 1.15 (0.93;<br>1.42)   |
| CRP (mg/L)                   | --               | 0.83 (0.55;<br>1.24)   | 0.91 (0.59;<br>1.4)    | 0.96 (0.59;<br>1.57)   | 0.75 (0.5; 1.1)        | 0.76 (0.5;<br>1.16)    | 0.88 (0.55;<br>1.41)   | 0.76 (0.51;<br>1.13)   | 0.75 (0.49;<br>1.14)   | 0.85 (0.53;<br>1.38)   |
| Fibrinogen (mg/dL)           | --               | 0.98 (0.92;<br>1.05)   | 1.02 (0.95;<br>1.1)    | 1.06 (0.98;<br>1.15)   | 0.98 (0.92;<br>1.05)   | 1.02 (0.95;<br>1.1)    | 1.06 (0.97;<br>1.15)   | 0.99 (0.92;<br>1.06)   | 1.03 (0.95;<br>1.11)   | 1.07 (0.98;<br>1.16)   |
| <b>Categorical variables</b> | <b>Reference</b> | <b>OR<br/>(95% CI)</b> |
| Current smoker               | 1                | 0.74 (0.27;<br>2.07)   | 0.82 (0.27;<br>2.45)   | 0.89 (0.24;<br>3.27)   | 0.76 (0.27;<br>2.13)   | 0.85 (0.28;<br>2.54)   | 0.93 (0.26;<br>3.38)   | 0.71 (0.25;<br>2.02)   | 0.88 (0.29;<br>2.66)   | 1.04 (0.28;<br>3.81)   |
| Low physical activity        | 1                | 1.13 (0.58;<br>2.18)   | 0.64 (0.31;<br>1.3)    | 0.36 (0.16;<br>0.82)   | 1.1 (0.56;<br>2.13)    | 0.61 (0.3;<br>1.25)    | 0.35 (0.16;<br>0.8)    | --                     | --                     | --                     |
| Obesity                      | 1                | 3.69 (1.24; 11)        | 4.19 (1.36;<br>12.9)   | 2.68 (0.8;<br>8.99)    | --                     | --                     | --                     | 3.81 (1.28;<br>11.39)  | 4.43 (1.44;<br>13.66)  | 2.92 (0.87;<br>9.83)   |
| Overweight and obese         | 1                | 1.84 (0.98;<br>3.45)   | 1.81 (0.92;<br>3.56)   | 1.31 (0.61;<br>2.83)   | --                     | --                     | --                     | 1.96 (1.04;<br>3.69)   | 1.88 (0.95;<br>3.72)   | 1.36 (0.63;<br>2.96)   |
| Hypertension                 | 1                | 1.04 (0.3;<br>3.64)    | 1.05 (0.31;<br>3.61)   | 1.06 (0.31;<br>3.67)   | 0.85 (0.24;<br>2.98)   | 0.82 (0.24;<br>2.82)   | 0.86 (0.25;<br>2.97)   | 0.87 (0.25;<br>3.07)   | 0.85 (0.24;<br>2.93)   | 0.9 (0.26;<br>3.17)    |
| Diabetes                     | 1                | 0.55 (0.05;<br>6.28)   | 2.37 (0.26;<br>21.5)   | 1.05 (0.08;<br>13.33)  | 0.51 (0.04;<br>5.89)   | 2.06 (0.22;<br>19.52)  | 0.96 (0.07;<br>12.61)  | 0.56 (0.05;<br>6.66)   | 2.09 (0.21;<br>21.14)  | 0.86 (0.06;<br>12.46)  |
| IFG or diabetes              | 1                | 0.77 (0.15;<br>4.02)   | 1.31 (0.26;<br>6.59)   | 0.86 (0.15;<br>5.1)    | 0.59 (0.11;<br>3.13)   | 0.86 (0.16;<br>4.51)   | 0.63 (0.1;<br>3.94)    | 0.5 (0.09;<br>2.83)    | 0.82 (0.15;<br>4.51)   | 0.6 (0.09;<br>4.05)    |
| Hypercholesterolemia         | 1                | 1.97 (0.94;<br>4.13)   | 2.1 (0.98;<br>4.52)    | 2.21 (0.96;<br>5.09)   | 1.75 (0.83;<br>3.69)   | 1.72 (0.79;<br>3.75)   | 1.98 (0.85;<br>4.61)   | 1.76 (0.83;<br>3.73)   | 1.71 (0.78;<br>3.74)   | 1.93 (0.82;<br>4.51)   |
| Metabolic syndrome           | 1                | 1.47 (0.66;<br>3.25)   | 2.25 (1; 5.04)         | 1.33 (0.55;<br>3.19)   | 1.02 (0.44;<br>2.38)   | 1.38 (0.58;<br>3.27)   | 0.89 (0.35;<br>2.29)   | 1.04 (0.45;<br>2.42)   | 1.39 (0.59;<br>3.3)    | 0.9 (0.35;<br>2.31)    |

Notes: Model 1: adjusted for age, sex, individual's socioeconomic deprivation and parental education; Model 2: as Model 1 plus BMI; Model 3: as Model 2 plus physical activity in 3 MET score categories, with the exception of BMI and obesity / overweight where BMI was not considered.

\* SBP and DBP estimates derived from censored regression analyses.

Supplementary Table 6.  $\beta$  coefficients (95% CI), geometric mean ratios (95% CI), and odds ratios (95% CI) of cardiovascular risk factors in migrants by lifetime exposure to urban area.

| Migration Status                                     | Model 1            |                              |                              |                              | Model 2                      |                              |                              | Model 3                      |                              |                              |
|------------------------------------------------------|--------------------|------------------------------|------------------------------|------------------------------|------------------------------|------------------------------|------------------------------|------------------------------|------------------------------|------------------------------|
|                                                      | Quartile 1, lowest | Quartile 2                   | Quartile 3                   | Quartile 4, highest          | Quartile 2                   | Quartile 3                   | Quartile 4, highest          | Quartile 2                   | Quartile 3                   | Quartile 4, highest          |
| <b>Continuous normally distributed variables</b>     | Reference          | $\beta$ coefficient (95% CI) |
| BMI                                                  | --                 | 1.6 (0.7; 2.6)               | 0.8 (-0.2; 1.7)              | -0.1 (-1.1; 0.9)             | --                           | --                           | --                           | 1.8 (0.8; 2.8)               | 0.9 (-0.1; 1.9)              | 0 (-1; 1)                    |
| Waist-to-hip ratio                                   | --                 | 0.01 (0; 0.02)               | 0.01 (-0.01; 0.02)           | -0.01 (-0.02; 0.01)          | 0 (-0.01; 0.01)              | 0 (-0.01; 0.01)              | 0 (-0.02; 0.01)              | 0 (-0.01; 0.01)              | 0 (-0.01; 0.01)              | -0.01 (-0.02; 0.01)          |
| All skinfolds                                        | --                 | 7.4 (1.3; 13.4)              | 5.9 (-0.2; 11.9)             | 0.8 (-5.3; 6.8)              | 0 (-4.3; 4.3)                | 2.4 (-1.9; 6.7)              | 1.1 (-3.2; 5.3)              | 0.7 (-3.7; 5)                | 2.7 (-1.7; 7)                | 1 (-3.3; 5.3)                |
| Systolic blood pressure*                             | --                 | 1.3 (-2; 4.6)                | 0.2 (-3.1; 3.5)              | 0.9 (-2.5; 4.2)              | 0 (-3.3; 3.2)                | -0.4 (-3.6; 2.9)             | 1 (-2.3; 4.2)                | 0 (-3.3; 3.3)                | -0.4 (-3.7; 2.9)             | 0.8 (-2.5; 4.1)              |
| Diastolic blood pressure*                            | --                 | 1.5 (-0.7; 3.6)              | 1.6 (-0.6; 3.8)              | 0.6 (-1.5; 2.8)              | 0.2 (-1.8; 2.2)              | 1 (-1; 3)                    | 0.7 (-1.3; 2.7)              | 0.1 (-1.9; 2.2)              | 0.8 (-1.3; 2.8)              | 0.6 (-1.4; 2.7)              |
| Total cholesterol                                    | --                 | 7.4 (-1.8; 16.6)             | 5.7 (-3.5; 15)               | 3.8 (-5.5; 13.1)             | 4 (-5; 13.1)                 | 4.4 (-4.7; 13.4)             | 4.1 (-5; 13.1)               | 3.7 (-5.6; 12.9)             | 3.2 (-6.1; 12.4)             | 2.8 (-6.4; 12)               |
| HDL                                                  | --                 | -0.4 (-3.1; 2.2)             | -0.7 (-3.4; 1.9)             | -0.9 (-3.6; 1.7)             | 0.7 (-1.9; 3.3)              | -0.3 (-2.8; 2.3)             | -1 (-3.6; 1.6)               | 0.3 (-2.3; 2.9)              | -0.4 (-3; 2.2)               | -1.1 (-3.7; 1.5)             |
| LDL                                                  | --                 | 4.5 (-3.1; 12.2)             | 4.5 (-3.2; 12.2)             | 3.4 (-4.3; 11.2)             | 2 (-5.6; 9.6)                | 3.5 (-4.1; 11.1)             | 3.6 (-4; 11.2)               | 2 (-5.7; 9.8)                | 2.5 (-5.2; 10.3)             | 2.6 (-5.1; 10.3)             |
| TC/HDL ratio                                         | --                 | 0.3 (0; 0.6)                 | 0.2 (-0.1; 0.5)              | 0.2 (-0.2; 0.5)              | 0.1 (-0.2; 0.4)              | 0.1 (-0.2; 0.4)              | 0.2 (-0.1; 0.5)              | 0.1 (-0.2; 0.5)              | 0.1 (-0.2; 0.4)              | 0.2 (-0.1; 0.5)              |
| <b>Continuous non-normally distributed variables</b> | Reference          | Ratio (95% CI)               |
| Triglycerides (mg/dL)                                | --                 | 1.11 (0.97; 1.25)            | 1.04 (0.92; 1.18)            | 1.06 (0.93; 1.2)             | 1.03 (0.91; 1.16)            | 1.01 (0.9; 1.14)             | 1.06 (0.94; 1.2)             | 1.03 (0.91; 1.17)            | 1 (0.89; 1.14)               | 1.05 (0.93; 1.19)            |
| Glucose (mg/dL)                                      | --                 | 1.04 (1; 1.08)               | 1.02 (0.98; 1.06)            | 1 (0.96; 1.04)               | 1.02 (0.98; 1.07)            | 1.01 (0.97; 1.05)            | 1 (0.96; 1.04)               | 1.03 (0.99; 1.07)            | 1.01 (0.97; 1.06)            | 1.01 (0.97; 1.05)            |
| HbA <sub>1c</sub> (%)                                | --                 | 1.02 (0.99; 1.05)            | 1.02 (0.99; 1.05)            | 1 (0.97; 1.03)               | 1.01 (0.98; 1.04)            | 1.01 (0.98; 1.04)            | 1 (0.97; 1.03)               | 1.02 (0.99; 1.05)            | 1.01 (0.99; 1.05)            | 1 (0.97; 1.03)               |
| Insulin ( $\mu$ IU/mL)                               | --                 | 1.16 (0.88; 1.53)            | 1.03 (0.78; 1.36)            | 1.11 (0.84; 1.46)            | 0.98 (0.76; 1.27)            | 0.96 (0.74; 1.24)            | 1.12 (0.86; 1.45)            | 1 (0.77; 1.3)                | 0.97 (0.75; 1.27)            | 1.12 (0.86; 1.46)            |
| HOMA-IR                                              | --                 | 1.17 (0.99; 1.37)            | 1.2 (1.02; 1.41)             | 1.13 (0.96; 1.33)            | 1 (0.88; 1.15)               | 1.11 (0.97; 1.27)            | 1.13 (0.99; 1.29)            | 1.02 (0.89; 1.17)            | 1.13 (0.99; 1.3)             | 1.14 (0.99; 1.3)             |
| CRP (mg/L)                                           | --                 | 0.94 (0.69; 1.19)            | 0.92 (0.67; 1.17)            | 0.93 (0.67; 1.19)            | 0.82 (0.61; 1.03)            | 0.87 (0.64; 1.1)             | 0.93 (0.69; 1.17)            | 0.81 (0.6; 1.02)             | 0.83 (0.61; 1.05)            | 0.91 (0.67; 1.15)            |



|                              |                  |                        |                        |                        |                        |                        |                        |                        |                        |                        |
|------------------------------|------------------|------------------------|------------------------|------------------------|------------------------|------------------------|------------------------|------------------------|------------------------|------------------------|
|                              |                  | 1.29)                  | 1.25)                  | 1.27)                  | 1.11)                  | 1.18)                  | 1.27)                  | 1.11)                  | 1.14)                  | 1.24)                  |
| Fibrinogen (mg/dL)           | --               | 0.98 (0.93;<br>1.03)   | 1 (0.95; 1.06)         | 1.03 (0.98;<br>1.09)   | 0.97 (0.92;<br>1.03)   | 1 (0.95; 1.06)         | 1.03 (0.98;<br>1.09)   | 0.98 (0.93;<br>1.03)   | 1 (0.95; 1.06)         | 1.03 (0.98;<br>1.09)   |
| <b>Categorical variables</b> | <b>Reference</b> | <b>OR<br/>(95% CI)</b> |
| Current smoker               | 1                | 0.96 (0.41;<br>2.29)   | 1.52 (0.67;<br>3.43)   | 1.2 (0.51;<br>2.82)    | 1.01 (0.42;<br>2.42)   | 1.56 (0.69;<br>3.51)   | 1.18 (0.5;<br>2.78)    | 0.98 (0.4;<br>2.42)    | 1.75 (0.76; 4)         | 1.27 (0.53;<br>3.01)   |
| Low physical activity        | 1                | 0.58 (0.35;<br>0.96)   | 0.41 (0.24;<br>0.69)   | 0.61 (0.37; 1)         | 0.56 (0.33;<br>0.93)   | 0.4 (0.24;<br>0.68)    | 0.61 (0.36; 1)         | --                     | --                     | --                     |
| Obesity                      | 1                | 2.02 (1.11;<br>3.67)   | 1.35 (0.72;<br>2.52)   | 0.87 (0.45;<br>1.69)   | --                     | --                     | --                     | 2.22 (1.21;<br>4.09)   | 1.49 (0.79;<br>2.84)   | 0.93 (0.48;<br>1.82)   |
| Overweight and obese         | 1                | 2.24 (1.3;<br>3.86)    | 0.89 (0.54;<br>1.47)   | 0.8 (0.49;<br>1.33)    | --                     | --                     | --                     | 2.39 (1.37;<br>4.17)   | 0.92 (0.55;<br>1.54)   | 0.82 (0.5;<br>1.37)    |
| Hypertension                 | 1                | 1.67 (0.73;<br>3.84)   | 0.96 (0.41;<br>2.28)   | 1.9 (0.86; 4.2)        | 1.43 (0.62;<br>3.32)   | 0.87 (0.37;<br>2.08)   | 1.86 (0.84;<br>4.13)   | 1.48 (0.63;<br>3.5)    | 0.91 (0.37;<br>2.23)   | 1.92 (0.85;<br>4.33)   |
| Diabetes                     | 1                | 3.46 (0.67;<br>17.85)  | 1.62 (0.26;<br>9.99)   | 1.08 (0.15;<br>7.87)   | 3.2 (0.61;<br>16.8)    | 1.54 (0.25;<br>9.59)   | 1.07 (0.15;<br>7.8)    | 3.08 (0.58;<br>16.33)  | 1.41 (0.22;<br>9.09)   | 1 (0.13; 7.45)         |
| IFG or diabetes              | 1                | 1.47 (0.49;<br>4.46)   | 1.27 (0.41;<br>3.94)   | 0.36 (0.07;<br>1.81)   | 1.14 (0.36;<br>3.54)   | 1.07 (0.34;<br>3.4)    | 0.32 (0.06;<br>1.65)   | 1.33 (0.4;<br>4.49)    | 1.22 (0.35;<br>4.24)   | 0.35 (0.07;<br>1.94)   |
| Hypercholesterolemia         | 1                | 1.37 (0.83;<br>2.26)   | 1.39 (0.84;<br>2.29)   | 1.14 (0.68;<br>1.9)    | 1.18 (0.71;<br>1.98)   | 1.31 (0.79;<br>2.19)   | 1.15 (0.68;<br>1.93)   | 1.19 (0.71;<br>2.01)   | 1.29 (0.77;<br>2.18)   | 1.09 (0.65;<br>1.84)   |
| Metabolic syndrome           | 1                | 1.78 (1.06; 3)         | 0.93 (0.54;<br>1.6)    | 0.8 (0.46;<br>1.38)    | 1.31 (0.74;<br>2.32)   | 0.75 (0.42;<br>1.36)   | 0.74 (0.4;<br>1.36)    | 1.32 (0.74;<br>2.35)   | 0.74 (0.41;<br>1.36)   | 0.73 (0.4;<br>1.35)    |

Notes: Model 1: adjusted for age, sex, individual's socioeconomic deprivation and parental education; Model 2: as Model 1 plus BMI; Model 3: as Model 2 plus physical activity in 3 MET score categories, with the exception of BMI and obesity / overweight where BMI was not considered.

\* SBP and DBP estimates derived from censored regression analyses.
